# Supplementary material for: Methylomics analysis identifies ZNF671 as an epigenetically repressed novel tumor suppressor and a potential non-invasive biomarker for the detection of urothelial carcinoma
Source: PubMed Central journal article supplement (PMC4745746; doi:10.18632/oncotarget.4986), 2015-07-22
Supplement: oncotarget-06-29555-s001.pdf [file oncotarget-06-29555-s001.pdf]

**Methylomics analysis identifies ZNF671 as an epigenetically repressed novel tumor suppressor and a potential non-invasive biomarker for the detection of urothelial carcinoma**

**Supplementary Material**

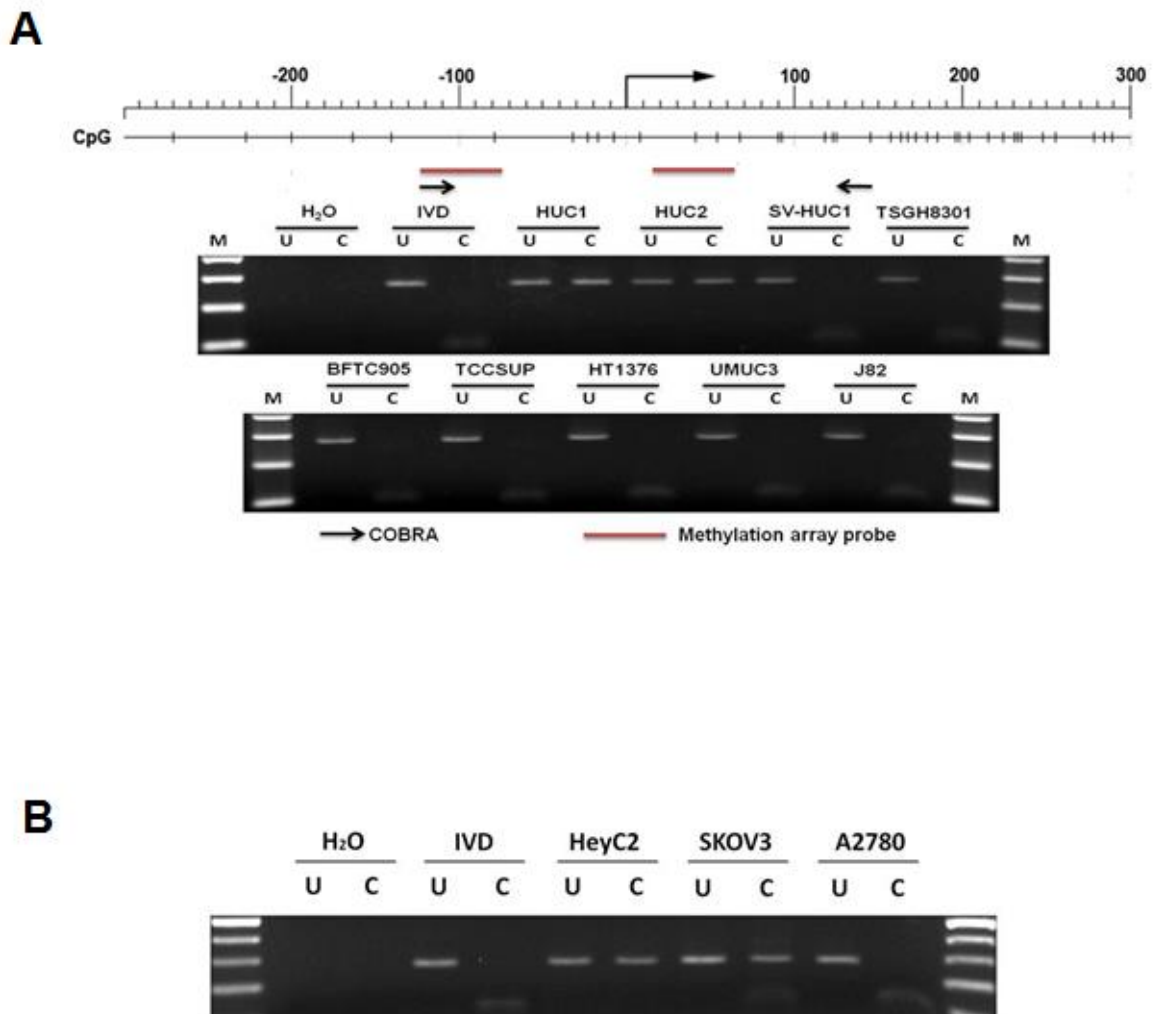

**Supplementary Figure 1.** DNA methylation analysis of two specific regions of the *ZNF671* promoter (diagrammed in top of A), in various bladder UC (A, lower two panels) vs. ovarian cancer cell lines (B). COBRA (“C”) (combined bisulfite restriction analysis, Xiong and Laird, 1997) was used to assess *ZNF671* methylation status by gel electrophoresis of PCR amplified bisulfite-modified DNA digested with the DNA methylation-sensitive restriction enzyme *AciI*. Undigested control, “U”. “M,” 100 bp DNA ladder marker. “IVD,” (*in vitro* methylation DNA), a COBRA positive control to demonstrate complete digestion.

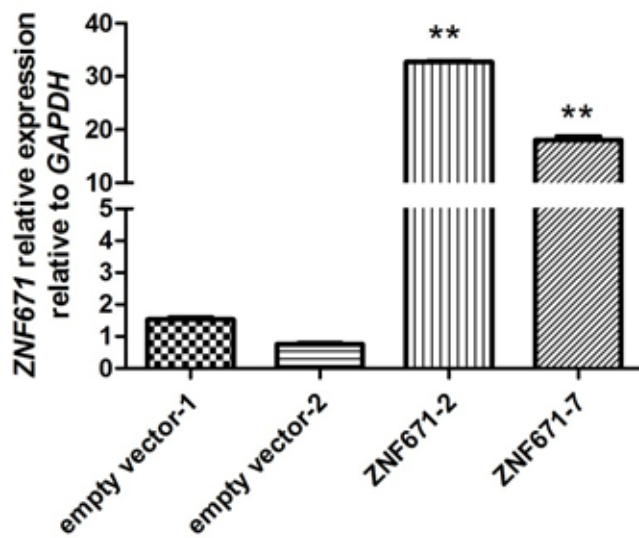

**Supplementary Figure 2.** *ZNF671* gene expression, relative to that of *GAPDH*, in empty vector- (left two bars) vs. *ZNF*-expressing (right two bars) UMUC3 UC stable cell clones, as determined here by quantitative PCR, were assessed for possible association with soft agar cell survival, in Figure 3. \*\*P<0.01

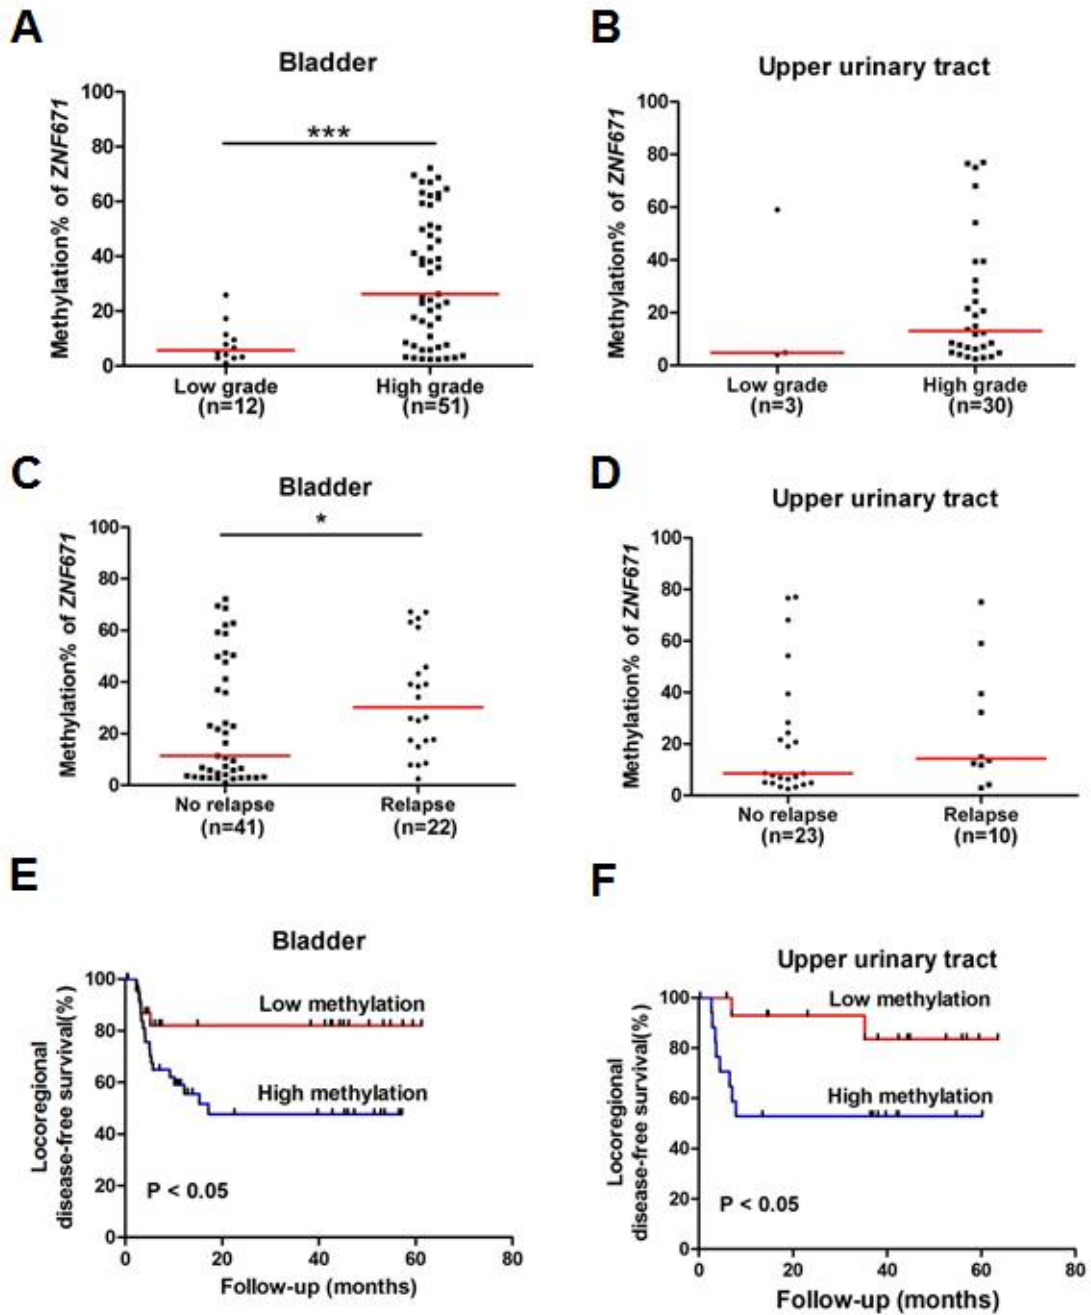

**Supplementary Figure 3.** *ZNF671* methylation in UC patient tumor tissue samples from bladder or upper urinary tract was determined by bisulphite pyrosequencing. Assessments of association between *ZNF671* methylation and tumor grade (A, B), relapse (C, D), and locoregional disease-free survival (E, F, by Kaplan-Meier analysis) are shown. \* $P < 0.05$ , \*\*\* $P < 0.01$

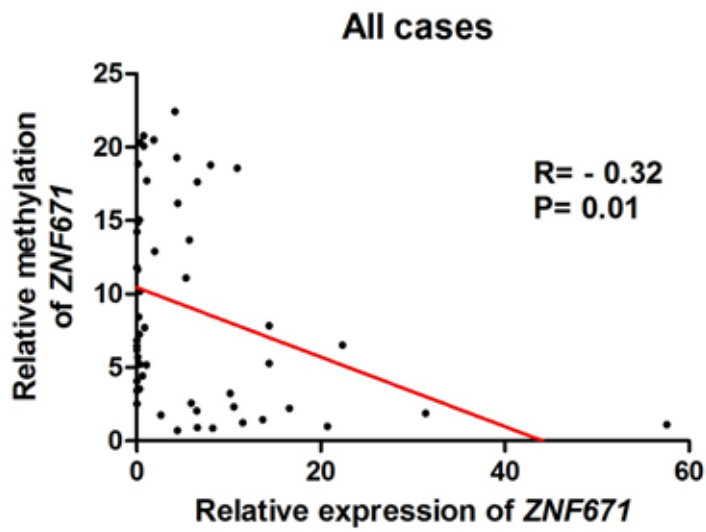

**Supplementary Figure 4.** Inverse relationship between *ZNF671* expression and methylation levels observed after excluding seven samples (i.e., low expression and low methylation). A positive correlation was observed (Spearman  $R = -0.32$ ,  $P=0.01$ ).

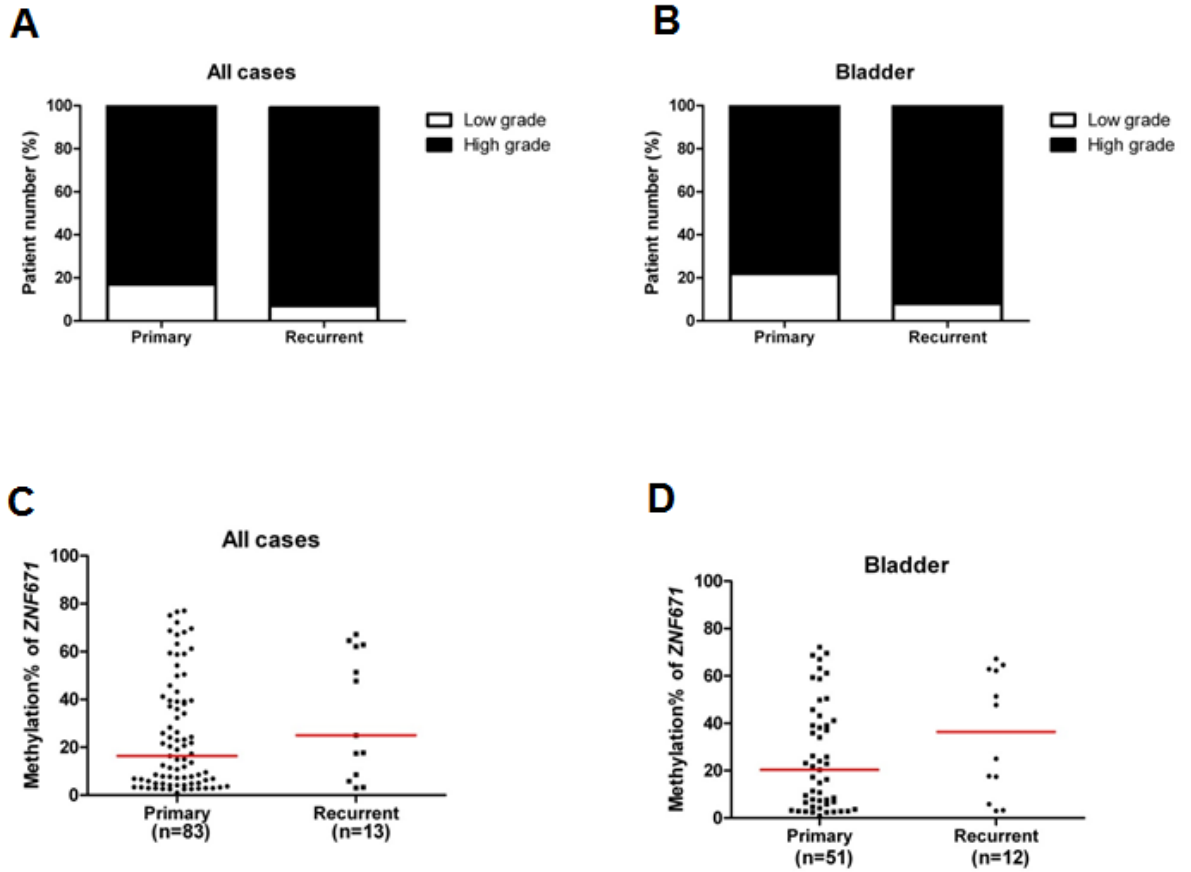

**Supplementary Figure 5.** Analysis of possible correlation between tumor grade and *ZNF671* methylation in primary or recurrent UC patient tumor tissue samples. Patients with recurrent tumors tended to have higher tumor grade (A, B) and higher *ZNF671* methylation (C, D), as compared to primary tumors. Tumor tissue samples (all cases, n=96, A, C,) or bladder UC patient tumor tissues only (n=63, B, D).

**Supplementary Table 1.** Primers used in this study

| Primer name                      | Primer sequence<br>(5' to 3') | Annealing<br>Temp (°C) | Product<br>size (bp) |
|----------------------------------|-------------------------------|------------------------|----------------------|
| <b>qMSP</b>                      |                               |                        |                      |
| ZNF671 MF1                       | TTTGGTCGGGGTTTTGTAAC          | 60                     | 100                  |
| ZNF671 MR1                       | AACATCAAACGCGTCTCG            |                        |                      |
| <i>β-actin</i> (ACTB) MF         | TGGTGATGGAGGAGGTTTAGTAAGT     | 60                     | 133                  |
| <i>β-actin</i> (ACTB) MR         | AACCAATAAAACCTACTCCTCCCTTAA   |                        |                      |
| <b>COBRA</b>                     |                               |                        |                      |
| ZNF671 BS-F                      | TTTTGAAGGATAGTTTAGTGGAAT      | 58                     | 272                  |
| ZNF671 BS-R                      | CCATCCCTACAAAACATCAA          |                        |                      |
| <b>Bisulphite Pyrosequencing</b> |                               |                        |                      |
| ZNF671_Pyro-F                    | ATTTAATGAGGGTTTAGGAGAGG       | 60                     | 228                  |
| ZNF671_Pyro-R                    | CAAACACTTCCCTCCCTACAAAACAT    |                        |                      |
| ZNF671_SEQ                       | GGATATTTTGTTTTGTTAGGT         |                        |                      |
| <b>RT-PCR</b>                    |                               |                        |                      |
| ZNF671 RT F                      | GTCATGAAACTAGAGCGAGGAGAA      | 60                     | 108                  |
| ZNF671 RT R                      | ATGCCAACAACCAGGTCTAAGTC       |                        |                      |
| GAPDH RT-F                       | CCCCTTCATTGACCTCAACTACAT      | 60                     | 135                  |
| GAPDH RT-R                       | CGCTCCTGGAAGATGGTGA           |                        |                      |
| E-cadherin RT-F                  | AAACAGGATGGCTGAAGGTG          | 60                     | 159                  |
| E-cadherin RT-R                  | TGAATTCGGGCTTGTTGTC           |                        |                      |
| <b>Plasmid construction</b>      |                               |                        |                      |
| ZNF671 cDNA                      | CGGGGTACCGAGATGTTGTCCCCAGTGT  | 58                     | 1626                 |
| KpnI_F                           | CCC                           |                        |                      |
| ZNF671 cDNA                      | CGCGGATCCTTAAAGCTTTTCTCCAGCAT |                        |                      |
| BamHI_R                          | GAACCC                        |                        |                      |
| ZNF671 promoter                  | CTAGCTAGCAGGCGGAGGTTGCAGTCA   | 62                     | 960                  |
| NheI_F                           |                               |                        |                      |
| ZNF671 promoter                  | GGAAGATCTCAGTCCCCACCCCAAATAA  |                        |                      |
| BglII_R                          |                               |                        |                      |

**Supplementary Table 2.** The information of 31 probes in Illumina 27K CpG island methylation array

| Target ID  | SYMBOL   | CHR | Probe locations         | GENE_ID       | ACCESSION      | GID         | CPG_ISLAND_LOCATIONS   |
|------------|----------|-----|-------------------------|---------------|----------------|-------------|------------------------|
| cg03238797 | ADAMTS18 | 16  | 16:76026346-76026395    | GeneID:170692 | NM_139054.2    | GI:40806184 | 16:76025670-76027234   |
| cg15083233 | AKAP2    | 9   | 9:111850223-111850272   | GeneID:11217  | NM_001004065.2 | GI:51873057 | 9:111850025-111852175  |
| cg22187630 | CACNA1A  | 19  | 19:13477871-13477920    | GeneID:773    | NM_023035.1    | GI:13386497 | 19:13477638-13478603   |
| cg23300372 | CART     | 5   | 5: 71051188 -71051237   | GeneID:9607   | NM_004291.2    | GI:46852394 | 5:71050507-71051626    |
| cg08519905 | CD9      | 12  | 12:6178987-6179036      | GeneID:928    | NM_001769.2    | GI:21237762 | 12:6178825-6180741     |
| cg10238818 | CYYR1    | 21  | 21:26867425-26867474    | GeneID:116159 | NM_052954.2    | GI:45827794 | 21:26866776-26867613   |
| cg01839464 | DCC      | 18  | 18:48122427-48122476    | GeneID:1630   | NT_010966.13   | GI:4885174  | 18:48122009-48122893   |
| cg08575537 | EPO      | 7   | 7:100156514-100156563   | GeneID:2056   | NM_000799.2    | GI:62240996 | 7:100155958-100156762  |
| cg02489552 | FLJ40365 | 19  | 19:14982531-14982580    | GeneID:126402 | NM_173482.1    | GI:27735062 | 19:14982467-14983303   |
| cg21073927 | GATA4    | 8   | 8:11599516 -11599565    | GeneID:2626   | NM_002052.2    | GI:33188460 | 8:11598711-11600557    |
| cg26252167 | GPR6     | 6   | 6: 110407218 -110407267 | GeneID:2830   | NM_005284.2    | GI:31377786 | 6:110406816-110407975  |
| cg02332525 | GRM7     | 3   | 3:6878105 -6878154      | GeneID:2917   | NM_181874.1    | GI:32528267 | 3:6877272-6878818      |
| cg02774439 | HAND2    | 4   | 4:174687778-174687827   | GeneID:9464   | NM_021973.1    | GI:12545383 | 4:174686012-174689831  |
| cg11965370 | HNT      | 11  | 11:131286108-131286157  | GeneID:50863  | NM_016522.2    | GI:38045920 | 11:131285371-131286756 |
| cg15760840 | HOXA11   | 7   | 7:27191699-27191748     | GeneID:3207   | NM_005523.4    | GI:24497552 | 7:27189699-27192279    |
| cg17950095 | HOXA11   | 7   | 7:27191225-27191274     | GeneID:3207   | NM_005523.4    | GI:24497552 | 7:27189699-27192279    |
| cg24826867 | IRF8     | 16  | 16:84490306-84490355    | GeneID:3394   | NM_002163.2    | GI:55953136 | 16:84489299-84490591   |
| cg16902509 | ITGA8    | 10  | 10:15801318-15801367    | GeneID:8516   | NM_003638.1    | GI:49170033 | 10:15801302-15802503   |
| cg17834752 | KCNK9    | 8   | 8:140784373-140784422   | GeneID:51305  | NM_016601.2    | GI:16445406 | 8:140783691-140786611  |
| cg03469054 | KIAA1944 | 12  | 12:128953814-128953863  | GeneID:121256 | NM_133448.1    | GI:42734372 | 12:128953408-128955096 |
| cg04897683 | NEUROG1  | 5   | 5:134899361-134899410   | GeneID:4762   | NM_006161.2    | GI:38455395 | 5:134898284-134900130  |
| cg08441806 | NKX6-2   | 10  | 10:134449091-134449140  | GeneID:84504  | NM_177400.1    | GI:28912911 | 10:134447362-134452718 |

1

|            |        |    |                        |              |              |             |                        |
|------------|--------|----|------------------------|--------------|--------------|-------------|------------------------|
| cg09260089 | NKX6-2 | 10 | 10:134449850-134449899 | GeneID:84504 | NM_177400.1  | GI:28912911 | 10:134447362-134452718 |
| cg02260587 | PCDHB2 | 5  | 5:140454432-140454481  | GeneID:56133 | NM_018936.2  | GI:14195608 | 5:140454244-140454946  |
| cg21176048 | PEX5L  | 3  | 3:181237881-181237930  | GeneID:51555 | NM_016559.1  | GI:7706670  | 3:181236808-181238032  |
| cg04490714 | SLC6A2 | 16 | 16:54248065-54248114   | GeneID:6530  | NM_001043.2  | GI:65506986 | 16:54246902-54248577   |
| cg16428251 | SOX14  | 3  | 3: 138966121-38966170  | GeneID:8403  | NM_004189.2  | GI:31563384 | 3:138964433-138967163  |
| cg04391111 | TP73   | 1  | 1: 3557864-3557913     | GeneID:7161  | NT_004321.17 | GI:4885644  | 1:3556965-3559547      |
| cg09053680 | UTF1   | 10 | 10:134894104-134894153 | GeneID:8433  | NM_003577.2  | GI:71043875 | 10:134892848-134895213 |
| cg19246110 | ZNF671 | 19 | 19:62930740-62930789   | GeneID:79891 | NM_024833.1  | GI:13376239 | 19:62930217-62931307   |
| cg23857226 | ZNF671 | 19 | 19:62930886-62930935   | GeneID:79891 | NM_024833.1  | GI:13376239 | 19:62930217-62931307   |

**Supplementary Table 3.** Gene Ontology (GO) analysis on molecular function (MF) of the 31 methylated probes using DAVID Bioinformatics Resources 6.7

| Term                                              | Gene count | P-values |
|---------------------------------------------------|------------|----------|
| GO:0030528~transcription regulator activity       | 10         | 3.05E-04 |
| GO:0003700~transcription factor activity          | 8          | 6.01E-04 |
| GO:0043565~sequence-specific DNA binding          | 6          | 2.93E-03 |
| GO:0033613~transcription activator binding        | 2          | 1.29E-02 |
| GO:0003677~DNA binding                            | 9          | 2.37E-02 |
| GO:0016563~transcription activator activity       | 4          | 2.73E-02 |
| GO:0022832~voltage-gated channel activity         | 3          | 3.91E-02 |
| GO:0005245~voltage-gated calcium channel activity | 2          | 4.44E-02 |
| GO:0003713~transcription coactivator activity     | 3          | 4.62E-02 |
| GO:0008134~transcription factor binding           | 4          | 4.81E-02 |



**Supplementary Table 4** .Correlation between methylation of *ZNF671* and clinical-pathological data in 96 UC tumor tissue samples

|                                       | Bladder (n=63)                     |                  | Upper urinary tract (n=33) |                  |
|---------------------------------------|------------------------------------|------------------|----------------------------|------------------|
|                                       | Methylation (%)                    | P                | Methylation (%)            | P                |
| <b>Age</b>                            |                                    |                  |                            |                  |
| < 60 years                            | 22.80 ± 23.38 <sup>2</sup> (11/63) | 0.46             | 26.00 ± 31.59 (8/33)       | 0.75             |
| ≥ 60 years                            | 28.53 ± 23.33 (52/63)              |                  | 22.43 ± 21.93 (25/33)      |                  |
| <b>Gender</b>                         |                                    |                  |                            |                  |
| Male                                  | 27.77 ± 23.25 (51/63)              | 0.66             | 23.87 ± 26.65 (17/33)      | 0.65             |
| Female                                | 26.50 ± 24.26 (12/63)              |                  | 22.69 ± 21.95 (16/33)      |                  |
| <b>Histological Grade<sup>1</sup></b> |                                    |                  |                            |                  |
| Low grade                             | 8.14 ± 7.20 (12/63)                | <b>0.001</b>     | 22.70 ± 31.49 (3/33)       | 0.59             |
| High grade                            | 32.09 ± 23.40 (51/63)              |                  | 23.36 ± 23.94 (30/33)      |                  |
| <b>Pathological Stage</b>             |                                    |                  |                            |                  |
| pT1                                   | 28.68 ± 24.35 (44/63)              | 0.89             | 33.84 ± 32.13 (10/33)      | 0.28             |
| pT2-4                                 | 24.85 ± 20.86 (19/63)              |                  | 18.71 ± 18.73 (23/33)      |                  |
| <b>Primary/Recurrent</b>              |                                    |                  |                            |                  |
| Primary                               | 25.61 ± 22.41 (51/63)              | 0.19             | 23.75 ± 24.35 (32/33)      | NA               |
| Recurrent                             | 35.69 ± 26.00 (12/63)              |                  | 8.65125 (1/33)             |                  |
| <b>Relapse</b>                        |                                    |                  |                            |                  |
| Yes                                   | 33.36 ± 21.18 (22/63)              | 0.02             | 26.60 ± 24.47 (10/33)      | 0.46             |
| No                                    | 24.40 ± 23.96 (41/63)              |                  | 21.86 ± 22.74 (23/33)      |                  |
| <b>Methylation</b>                    |                                    |                  |                            |                  |
| Low                                   | 4.97 ± 2.63 (24/63)                | <b>&lt;0.001</b> | 5.36 ± 2.04 (15/33)        | <b>&lt;0.001</b> |
| High                                  | 41.41 ± 18.95 (39/63)              |                  | 38.24 ± 23.89 (18/33)      |                  |

<sup>1</sup>Grading, low grade: G1; high grade: G2-3;

<sup>2</sup>Mean ± SD

**Supplementary Table 5.** Hazard ratio for locoregional recurrence according to predictive factors in 63 bladder UC tissue samples

|                           | HR(95% CI); P value               |                            |
|---------------------------|-----------------------------------|----------------------------|
|                           | Univariate analysis               | Multivariate analysis      |
| <b>Age</b>                |                                   |                            |
| <60 vs ≥60                | 2.764(0.645-11.836);0.171         | NA                         |
| <b>Gender</b>             |                                   |                            |
| Male vs Female            | 0.034(0.000-2.898);0.136          | NA                         |
| <b>Histological Grade</b> |                                   |                            |
| Low vs High grade         | 1.938(0.572-6.564);0.288          | 1.488(0.395-5.602);0.557   |
| <b>Pathological Stage</b> |                                   |                            |
| pT1 vs pT2-4              | 0.587(0.199-1.736);0.336          | 0.486(0.161-1.467);0.201   |
| <b>Primary/Recurrent</b>  |                                   |                            |
| Primary vs Recurrent      | 1.860(0.684-5.053);0.224          | 1.773(0.647-4.860);0.266   |
| <b>Treatment</b>          |                                   |                            |
| TURBT vs cystectomy       | 0.045(0.000-271.35);0.486         | NA                         |
| <b>ZNF671 Methylation</b> |                                   |                            |
| Low vs High               | 3.029(1.023-8.966); <b>0.045*</b> | 2.753 (0.868-8.727); 0.085 |

**Abbreviation:** HR, hazard ratio; 95% CI, 95% confidence interval;

TURBT, trans-urethral resection of bladder tumor

**Supplementary Table 6.** Hazard ratio for recurrence according to predictive factors in 33 upper urinary tract UC tissue samples

|                           | HR(95% CI); P value         |                                    |
|---------------------------|-----------------------------|------------------------------------|
|                           | Univariate analysis         | Multivariate analysis              |
| <b>Age</b>                |                             |                                    |
| < 60 vs ≥60               | 0.819(0.211-3.176);0.773    | NA                                 |
| <b>Gender</b>             |                             |                                    |
| Male vs Female            | 1.063(0.307-3.679);0.923    | NA                                 |
| <b>Histological Grade</b> |                             |                                    |
| Low vs High grade         | 0.343(0.072-1.637);0.179    | 0.078(0.09-0.707); <b>0.023*</b>   |
| <b>Pathological Stage</b> |                             |                                    |
| pT1 vs pT2-4              | 1.585(0.336-7.474);0.561    | 3.716(0.524-26.33);0.189           |
| <b>Primary/Recurrent</b>  |                             |                                    |
| Primary vs Recurrent      | 0.047(0.000-76764.23);0.675 | NA                                 |
| <b>ZNF671 Methylation</b> |                             |                                    |
| Low vs High               | 4.473(0.948-21.104);0.058   | 7.889(1.323-47.058); <b>0.023*</b> |

**Abbreviation:** HR, hazard ratio; 95% CI, 95% confidence interval;  
TURBT, trans-urethral resection of bladder tumor
